# Supplementary material for: Down-regulated C4orf19 confers poor prognosis in colon adenocarcinoma identified by gene co-expression network
Source: PubMed Central journal article supplement (PMC8899380; doi:10.7150/jca.63635), 2022-01-09
Supplement: jcav13p1145s1.pdf [file jcav13p1145s1.pdf]

# Supplementary materials

**Supplementary Table S1.** Top 50 upregulated and 50 downregulated genes in colon adenocarcinoma (COAD) patients based on TCGA dataset.

**Supplementary Table S2.** Gene ontology (GO) biological process (BP) term of differentially expressed genes (DEGs) enriched in.

**Supplementary Table S3.** Gene ontology (GO) biological process (BP) term of down-regulated differentially expressed genes (DEGs).

**Supplementary Table S4.** Overview of 9 modules constructed by Weighted gene correlation network analysis (WGCNA). (DEG: the differentially expressed genes (DEGs) through the above analysis; COX: prognosis-related genes with  $P_{\text{Cox}} < 0.05$  explored by univariate Cox analyses. HUB: the 10% of genes with the highest connectivity was defined as hub genes in each module; DEG-COX-HUB: the intersection of DEGs, COX genes and hub genes.)

**Supplementary Table S5** The gene sets significantly enriched with high levels of C4orf19 (FDR < 0.05).

**Supplementary Figure. S1.** The flowchart for obtaining the gene co-expression network and experimental validation

**Supplementary Figure. S2.** Expression of six hub genes between normal tissues and COAD. \*\*\*  $P < 0.001$ .

**Supplementary Figure. S3.** The gene sets significantly enriched with high levels of C4orf19 (FDR < 0.05), ordered by enrichment score.

**Supplementary Figure. S4.** The gene set of “nitrogen metabolism pathway” was enriched in high levels of C4orf19 (FDR < 0.05). (A) Transcriptional expression profiles of the significant genes were shown in a heat map. (B) GSEA details of nitrogen metabolism pathway.

**Supplementary Table S1.** Top 50 upregulated and 50 downregulated genes in colon adenocarcinoma (COAD) patients based on TCGA dataset.

| upregulated genes |       |         |           | downregulated genes |        |         |           |
|-------------------|-------|---------|-----------|---------------------|--------|---------|-----------|
| Gene              | logFC | AveExpr | adj.P.Val | Gene                | logFC  | AveExpr | adj.P.Val |
| DPEP1             | 4.479 | 5.264   | 4.22E-29  | AQP8                | -6.944 | 2.282   | 8.88E-74  |
| ETV4              | 4.215 | 4.606   | 1.30E-98  | CA1                 | -6.496 | 1.551   | 3.55E-97  |
| FOXQ1             | 4.093 | 4.111   | 9.50E-64  | GUCA2B              | -6.098 | 1.648   | 2.20E-91  |
| CLDN2             | 3.999 | 4.243   | 1.10E-25  | ZG16                | -6.097 | 2.801   | 7.15E-46  |
| CDH3              | 3.734 | 3.685   | 1.73E-98  | CLCA4               | -6.064 | 2.231   | 7.07E-60  |
| CLDN1             | 3.724 | 4.304   | 2.16E-69  | GUCA2A              | -6.047 | 4.197   | 3.00E-53  |
| CST1              | 3.692 | 3.474   | 2.39E-26  | CD177               | -5.862 | 1.968   | 1.54E-71  |
| MMP7              | 3.625 | 3.504   | 3.09E-25  | SLC26A3             | -5.791 | 4.563   | 3.12E-37  |
| CEMIP             | 3.487 | 3.744   | 4.46E-56  | TMIGD1              | -5.640 | 1.272   | 6.51E-111 |
| ASCL2             | 3.321 | 5.322   | 5.74E-32  | MS4A12              | -5.561 | 2.012   | 1.75E-60  |
| KRT23             | 3.236 | 3.144   | 5.48E-18  | CA4                 | -5.465 | 2.237   | 1.30E-56  |
| TESC              | 3.205 | 4.052   | 1.42E-30  | IGHA2               | -5.314 | 7.468   | 5.00E-23  |
| MMP1              | 3.195 | 4.368   | 1.80E-20  | CA2                 | -5.194 | 4.293   | 3.20E-54  |
| TRIB3             | 3.195 | 4.285   | 1.88E-67  | CEACAM7             | -5.103 | 5.071   | 7.80E-34  |
| KRT80             | 3.116 | 2.934   | 5.99E-63  | CLCA1               | -5.092 | 4.176   | 2.15E-23  |
| GDF15             | 3.064 | 5.973   | 2.05E-42  | CHGA                | -5.008 | 1.761   | 1.36E-65  |
| MMP11             | 2.981 | 3.781   | 3.90E-31  | JCHAIN              | -4.999 | 6.450   | 9.59E-27  |
| LARGE2            | 2.974 | 3.366   | 1.88E-42  | PYY                 | -4.947 | 1.164   | 2.82E-94  |
| TGFBI             | 2.947 | 6.411   | 4.11E-42  | CA7                 | -4.947 | 1.200   | 1.10E-138 |
| C6orf223          | 2.944 | 3.005   | 2.75E-52  | ADH1C               | -4.718 | 3.383   | 2.70E-44  |
| SLC7A5            | 2.941 | 5.113   | 3.78E-63  | OTOP2               | -4.629 | 0.563   | 4.06E-202 |
| CPNE7             | 2.929 | 2.917   | 6.84E-37  | ANPEP               | -4.561 | 3.600   | 1.85E-43  |
| MMP3              | 2.925 | 3.293   | 7.63E-20  | BEST4               | -4.430 | 1.120   | 7.06E-154 |
| CA9               | 2.854 | 3.231   | 9.14E-16  | SLC26A2             | -4.338 | 3.409   | 4.26E-48  |
| SLCO4A1           | 2.834 | 3.964   | 3.01E-58  | CHP2                | -4.301 | 3.129   | 2.82E-44  |
| S100P             | 2.825 | 6.906   | 1.38E-28  | LYPD8               | -4.209 | 3.291   | 1.10E-36  |
| CXCL8             | 2.811 | 4.063   | 2.22E-19  | MT1M                | -4.156 | 1.835   | 4.36E-61  |
| TNS4              | 2.746 | 4.250   | 8.36E-32  | DES                 | -4.151 | 4.212   | 2.11E-21  |
| PRSS22            | 2.741 | 3.084   | 1.71E-46  | SLC4A4              | -4.039 | 1.311   | 5.92E-90  |
| NOTUM             | 2.739 | 2.535   | 6.35E-12  | MYH11               | -4.019 | 2.986   | 2.18E-35  |
| ELFN1-AS1         | 2.679 | 2.776   | 2.68E-35  | ITLN1               | -4.018 | 3.682   | 3.26E-18  |
| CXCL1             | 2.679 | 5.239   | 1.21E-24  | UGT2B17             | -4.017 | 2.935   | 4.78E-21  |
| GRIN2D            | 2.663 | 2.758   | 2.70E-49  | IGHA1               | -3.962 | 8.658   | 6.86E-17  |
| LY6G6D            | 2.626 | 2.701   | 2.62E-12  | SLC51B              | -3.916 | 2.596   | 4.80E-62  |
| SCD               | 2.619 | 6.214   | 3.05E-39  | FCGBP               | -3.861 | 4.438   | 7.05E-22  |

---

|           |       |       |          |          |        |       |           |
|-----------|-------|-------|----------|----------|--------|-------|-----------|
| PDX1      | 2.605 | 2.697 | 9.94E-44 | MT1H     | -3.695 | 2.119 | 7.71E-48  |
| SPP1      | 2.539 | 4.339 | 4.16E-12 | MT1G     | -3.687 | 4.988 | 1.55E-32  |
| TNFRSF12A | 2.526 | 4.752 | 7.54E-59 | FABP1    | -3.686 | 6.503 | 3.15E-20  |
| AZGP1     | 2.523 | 4.296 | 1.03E-24 | SCARA5   | -3.653 | 1.068 | 1.78E-117 |
| CTHRC1    | 2.521 | 3.424 | 5.58E-26 | CLEC3B   | -3.633 | 1.840 | 4.06E-107 |
| NFE2L3    | 2.516 | 4.812 | 1.28E-73 | VSIG2    | -3.630 | 3.407 | 1.14E-24  |
| KLK6      | 2.504 | 2.298 | 2.76E-14 | SST      | -3.615 | 0.773 | 4.18E-101 |
| TRIM29    | 2.453 | 2.689 | 2.54E-28 | PKIB     | -3.613 | 1.922 | 8.64E-71  |
| CXCL3     | 2.435 | 3.862 | 8.53E-25 | SCNN1B   | -3.611 | 1.463 | 2.18E-67  |
| CEL       | 2.432 | 2.486 | 1.80E-11 | IGHV3-74 | -3.565 | 3.925 | 4.08E-22  |
| FABP6     | 2.411 | 2.728 | 8.34E-21 | ADAMDEC1 | -3.561 | 3.364 | 4.64E-46  |
| NKD2      | 2.404 | 2.697 | 1.65E-25 | NXPE4    | -3.548 | 3.059 | 1.21E-24  |
| PSAT1     | 2.401 | 4.491 | 7.92E-36 | ADH1B    | -3.544 | 0.947 | 1.54E-85  |
| SERPINB5  | 2.366 | 3.140 | 1.12E-15 | IGLV2-8  | -3.532 | 3.655 | 1.21E-22  |
| SLC6A6    | 2.326 | 3.632 | 3.40E-40 | AKR1B10  | -3.529 | 2.950 | 1.73E-35  |

---

**Supplementary Table S2.** Gene ontology (GO) biological process (BP) term of up-regulated differentially expressed genes (DEGs).

| GO NO.     | BP Term                                                                                       | Count | GeneRatio(%) | FDR      |
|------------|-----------------------------------------------------------------------------------------------|-------|--------------|----------|
| GO:0000082 | G1/S transition of mitotic cell cycle                                                         | 27    | 3.195        | 1.93E-10 |
| GO:0051301 | cell division                                                                                 | 50    | 5.917        | 1.93E-10 |
| GO:0007067 | mitotic nuclear division                                                                      | 38    | 4.497        | 2.08E-08 |
| GO:0006260 | DNA replication                                                                               | 29    | 3.432        | 4.76E-08 |
| GO:0030574 | collagen catabolic process                                                                    | 18    | 2.130        | 4.62E-07 |
| GO:0006364 | rRNA processing                                                                               | 31    | 3.669        | 3.74E-06 |
| GO:0008283 | cell proliferation                                                                            | 41    | 4.852        | 1.60E-05 |
| GO:0006865 | amino acid transport                                                                          | 12    | 1.420        | 4.38E-05 |
| GO:0007062 | sister chromatid cohesion                                                                     | 19    | 2.249        | 9.32E-05 |
| GO:0000281 | mitotic cytokinesis                                                                           | 10    | 1.183        | 5.73E-04 |
| GO:0008284 | positive regulation of cell proliferation                                                     | 43    | 5.089        | 8.88E-04 |
| GO:0030199 | collagen fibril organization                                                                  | 11    | 1.302        | 8.88E-04 |
| GO:0006270 | DNA replication initiation                                                                    | 10    | 1.183        | 1.10E-03 |
| GO:0042127 | regulation of cell proliferation                                                              | 23    | 2.722        | 2.51E-03 |
| GO:0031100 | organ regeneration                                                                            | 11    | 1.302        | 4.26E-03 |
| GO:0007059 | chromosome segregation                                                                        | 13    | 1.538        | 4.57E-03 |
| GO:0006268 | DNA unwinding involved in DNA replication                                                     | 6     | 0.710        | 4.96E-03 |
| GO:0000070 | mitotic sister chromatid segregation                                                          | 8     | 0.947        | 9.61E-03 |
| GO:0000086 | G2/M transition of mitotic cell cycle                                                         | 18    | 2.130        | 1.04E-02 |
| GO:0048146 | positive regulation of fibroblast proliferation                                               | 11    | 1.302        | 1.13E-02 |
| GO:0030198 | extracellular matrix organization                                                             | 22    | 2.604        | 1.24E-02 |
| GO:0034475 | U4 snRNA 3'-end processing                                                                    | 5     | 0.592        | 2.64E-02 |
| GO:0006977 | DNA damage response, signal transduction by p53 class mediator resulting in cell cycle arrest | 11    | 1.302        | 3.26E-02 |
| GO:0006271 | DNA strand elongation involved in DNA replication                                             | 6     | 0.710        | 3.26E-02 |
| GO:1904874 | positive regulation of telomerase RNA localization to Cajal body                              | 6     | 0.710        | 3.26E-02 |
| GO:0006564 | L-serine biosynthetic process                                                                 | 4     | 0.473        | 3.26E-02 |
| GO:0000083 | regulation of transcription involved in G1/S transition of mitotic cell cycle                 | 7     | 0.828        | 3.26E-02 |

---

|            |                                                                   |    |       |          |
|------------|-------------------------------------------------------------------|----|-------|----------|
| GO:0032212 | positive regulation of telomere maintenance via telomerase        | 8  | 0.947 | 3.26E-02 |
| GO:0022617 | extracellular matrix disassembly                                  | 12 | 1.420 | 3.26E-02 |
| GO:0030324 | lung development                                                  | 12 | 1.420 | 3.26E-02 |
| GO:0034427 | nuclear-transcribed mRNA catabolic process, exonucleolytic, 3'-5' | 5  | 0.592 | 3.26E-02 |
| GO:0007051 | spindle organization                                              | 6  | 0.710 | 3.70E-02 |
| GO:0001649 | osteoblast differentiation                                        | 14 | 1.657 | 3.94E-02 |
| GO:0031145 | anaphase-promoting complex-dependent catabolic process            | 12 | 1.420 | 4.12E-02 |
| GO:0098609 | cell-cell adhesion                                                | 25 | 2.959 | 4.49E-02 |

---

**Supplementary Table S3.** Gene ontology (GO) biological process (BP) term of down-regulated differentially expressed genes (DEGs).

| GO NO.     | BP Term                                                         | Count | GeneRatio(%) | FDR      |
|------------|-----------------------------------------------------------------|-------|--------------|----------|
| GO:0006958 | complement activation, classical pathway                        | 61    | 5.365        | 1.54E-47 |
| GO:0006956 | complement activation                                           | 55    | 4.837        | 1.24E-43 |
| GO:0006898 | receptor-mediated endocytosis                                   | 68    | 5.981        | 4.55E-35 |
| GO:0006955 | immune response                                                 | 91    | 8.004        | 6.70E-28 |
| GO:0038096 | Fc-gamma receptor signaling pathway<br>involved in phagocytosis | 49    | 4.310        | 6.92E-26 |
| GO:0050776 | regulation of immune response                                   | 55    | 4.837        | 6.28E-24 |
| GO:0038095 | Fc-epsilon receptor signaling pathway                           | 50    | 4.398        | 1.40E-19 |
| GO:0006508 | proteolysis                                                     | 82    | 7.212        | 4.33E-17 |
| GO:0050853 | B cell receptor signaling pathway                               | 19    | 1.671        | 5.92E-08 |
| GO:0006910 | phagocytosis, recognition                                       | 14    | 1.231        | 1.51E-07 |
| GO:0006911 | phagocytosis, engulfment                                        | 14    | 1.231        | 3.82E-06 |
| GO:0050871 | positive regulation of B cell activation                        | 12    | 1.055        | 9.44E-06 |
| GO:0006936 | muscle contraction                                              | 22    | 1.935        | 4.66E-05 |
| GO:0071456 | cellular response to hypoxia                                    | 19    | 1.671        | 6.43E-04 |
| GO:0070374 | positive regulation of ERK1 and ERK2<br>cascade                 | 26    | 2.287        | 1.43E-03 |
| GO:0006874 | cellular calcium ion homeostasis                                | 17    | 1.495        | 6.00E-03 |
| GO:0045926 | negative regulation of growth                                   | 8     | 0.704        | 6.00E-03 |
| GO:0071294 | cellular response to zinc ion                                   | 8     | 0.704        | 6.00E-03 |
| GO:0071377 | cellular response to glucagon stimulus                          | 11    | 0.967        | 6.00E-03 |
| GO:0002548 | monocyte chemotaxis                                             | 11    | 0.967        | 8.98E-03 |
| GO:0007166 | cell surface receptor signaling pathway                         | 32    | 2.814        | 9.92E-03 |
| GO:0006954 | inflammatory response                                           | 40    | 3.518        | 9.92E-03 |
| GO:0015701 | bicarbonate transport                                           | 11    | 0.967        | 1.16E-02 |
| GO:0070098 | chemokine-mediated signaling pathway                            | 14    | 1.231        | 1.16E-02 |
| GO:0002250 | adaptive immune response                                        | 21    | 1.847        | 1.54E-02 |
| GO:0071276 | cellular response to cadmium ion                                | 7     | 0.616        | 2.13E-02 |
| GO:0071346 | cellular response to interferon-gamma                           | 12    | 1.055        | 2.19E-02 |
| GO:0006805 | xenobiotic metabolic process                                    | 14    | 1.231        | 2.66E-02 |

**Supplementary Table S4.** Overview of 9 modules constructed by Weighted gene correlation network analysis (WGCNA). (DEG: the differentially expressed genes (DEGs) through the above analysis; COX: prognosis-related genes with  $P_{Cox} < 0.05$  explored by univariate Cox analyses. HUB: the 10% of genes with the highest connectivity was defined as hub genes in each modules; DEG-COX-HUB: the intersection of DEGs, COX genes and hub genes.)

| Module Name | Size (n) | DEGs (n) | COX (n) | DEG-COX-HUB                                                     | Correlation with important clinic parameters                                                                                                                                                  |
|-------------|----------|----------|---------|-----------------------------------------------------------------|-----------------------------------------------------------------------------------------------------------------------------------------------------------------------------------------------|
| turquoise   | 749      | 1        | 110     | -                                                               | -                                                                                                                                                                                             |
| blue        | 231      | 1        | 104     | -                                                               | COAD: $r = 0.19$ $P = 7.4E-05$                                                                                                                                                                |
| brown       | 228      | 95       | 129     | AP001554.1<br>TEX11 C4orf19<br>CLCA4<br>AC016027.1<br>CLCA1 CA2 | COAD: $r = -0.82$ $P = 2.4E-102$<br>Clinical Stage: $r = -0.2$ $P = 4.7E-05$<br>T stage: $r = -0.19$ $P = 0.00012$<br>M stage: $r = -0.17$ $P = 0.00034$<br>N stage: $r = -0.2$ $P = 3.2E-05$ |
| yellow      | 222      | 42       | 61      | SPARCL1<br>CADM3 CRYAB<br>ArHGEF25<br>CHRDL1 PRELP              | COAD: $r = -0.56$ $P = 4.0E-36$<br>Clinical Stage: $r = 0.19$ $P = 9.8E-05$<br>T stage: $r = 0.17$ $P = 0.00047$<br>M stage: $r = 0.12$ $P = 0.018$<br>N stage: $r = 0.24$ $P = 5.3E-07$      |
| green       | 210      | 13       | 166     | -                                                               | -                                                                                                                                                                                             |
| red         | 192      | 0        | 35      | -                                                               | Clinical Stage: $r = 0.11$ $P = 0.026$<br>T stage: $r = 0.11$ $P = 0.019$<br>M stage: $r = 0.12$ $P = 0.011$<br>N stage: $r = 0.14$ $P = 0.0054$                                              |
| black       | 158      | 0        | 87      | -                                                               | N stage $r = 0.14$ $P = 0.0036$                                                                                                                                                               |
| pink        | 116      | 1        | 34      | NOTCH3                                                          | COAD: $r = 0.16$ $P = 0.0012$<br>Clinical Stage: $r = 0.16$ $P = 0.00073$<br>T stage: $r = 0.19$ $P = 0.00011$<br>N stage: $r = 0.21$ $P = 1.4E-05$                                           |
| magenta     | 48       | 0        | 182     | -                                                               | N stage $r = 0.15$ $P = 0.0027$                                                                                                                                                               |

**Supplementary Table S5** The gene sets significantly enriched with high levels of C4orf19.(FDR < 0.05)

| NAME                                                     | SIZE      | NES          | NOM p-val    | FDR q-val    |
|----------------------------------------------------------|-----------|--------------|--------------|--------------|
| <b>NITROGEN_METABOLISM</b>                               | <b>23</b> | <b>2.176</b> | <b>0.000</b> | <b>0.012</b> |
| STARCH_AND_SUCROSE_METABOLISM                            | 52        | 2.155        | 0.000        | 0.010        |
| RETINOL_METABOLISM                                       | 64        | 2.134        | 0.000        | 0.010        |
| PORPHYRIN_AND_CHLOROPHYLL_METABOLISM                     | 40        | 2.111        | 0.000        | 0.011        |
| ASCORBATE_AND_ALDARATE_METABOLISM                        | 25        | 2.020        | 0.004        | 0.024        |
| PENTOSE_AND_GLUCURONATE_INTERCONVERSIONS                 | 28        | 2.007        | 0.000        | 0.025        |
| AMINO_SUGAR_AND_NUCLEOTIDE_SUGAR_METABOLISM              | 43        | 2.026        | 0.000        | 0.025        |
| VALINE_LEUCINE_AND_ISOLEUCINE_DEGRADATION                | 43        | 1.970        | 0.006        | 0.030        |
| GLYCOSPHINGOLIPID_BIOSYNTHESIS_LACTO_AND_NEOLACTO_SERIES | 26        | 1.944        | 0.000        | 0.031        |
| DRUG_METABOLISM_CYTOCHROME_P450                          | 71        | 1.961        | 0.000        | 0.031        |
| ONE_CARBON_POOL_BY_FOLATE                                | 17        | 1.922        | 0.010        | 0.032        |
| CITRATE_CYCLE_TCA_CYCLE                                  | 31        | 1.926        | 0.008        | 0.033        |
| DRUG_METABOLISM_OTHER_ENZYMES                            | 51        | 1.978        | 0.000        | 0.033        |
| TERPENOID_BACKBONE_BIOSYNTHESIS                          | 15        | 1.945        | 0.004        | 0.034        |
| BUTANOATE_METABOLISM                                     | 34        | 1.928        | 0.008        | 0.034        |
| METABOLISM_OF_XENOBIOTICS_BY_CYTOCHROME_P450             | 69        | 1.905        | 0.002        | 0.037        |
| PEROXISOME                                               | 78        | 1.896        | 0.010        | 0.038        |
| FATTY_ACID_METABOLISM                                    | 42        | 1.860        | 0.009        | 0.050        |



**Supplementary Figure. S1.** The flowchart for obtaining the gene co-expression network and experimental validation

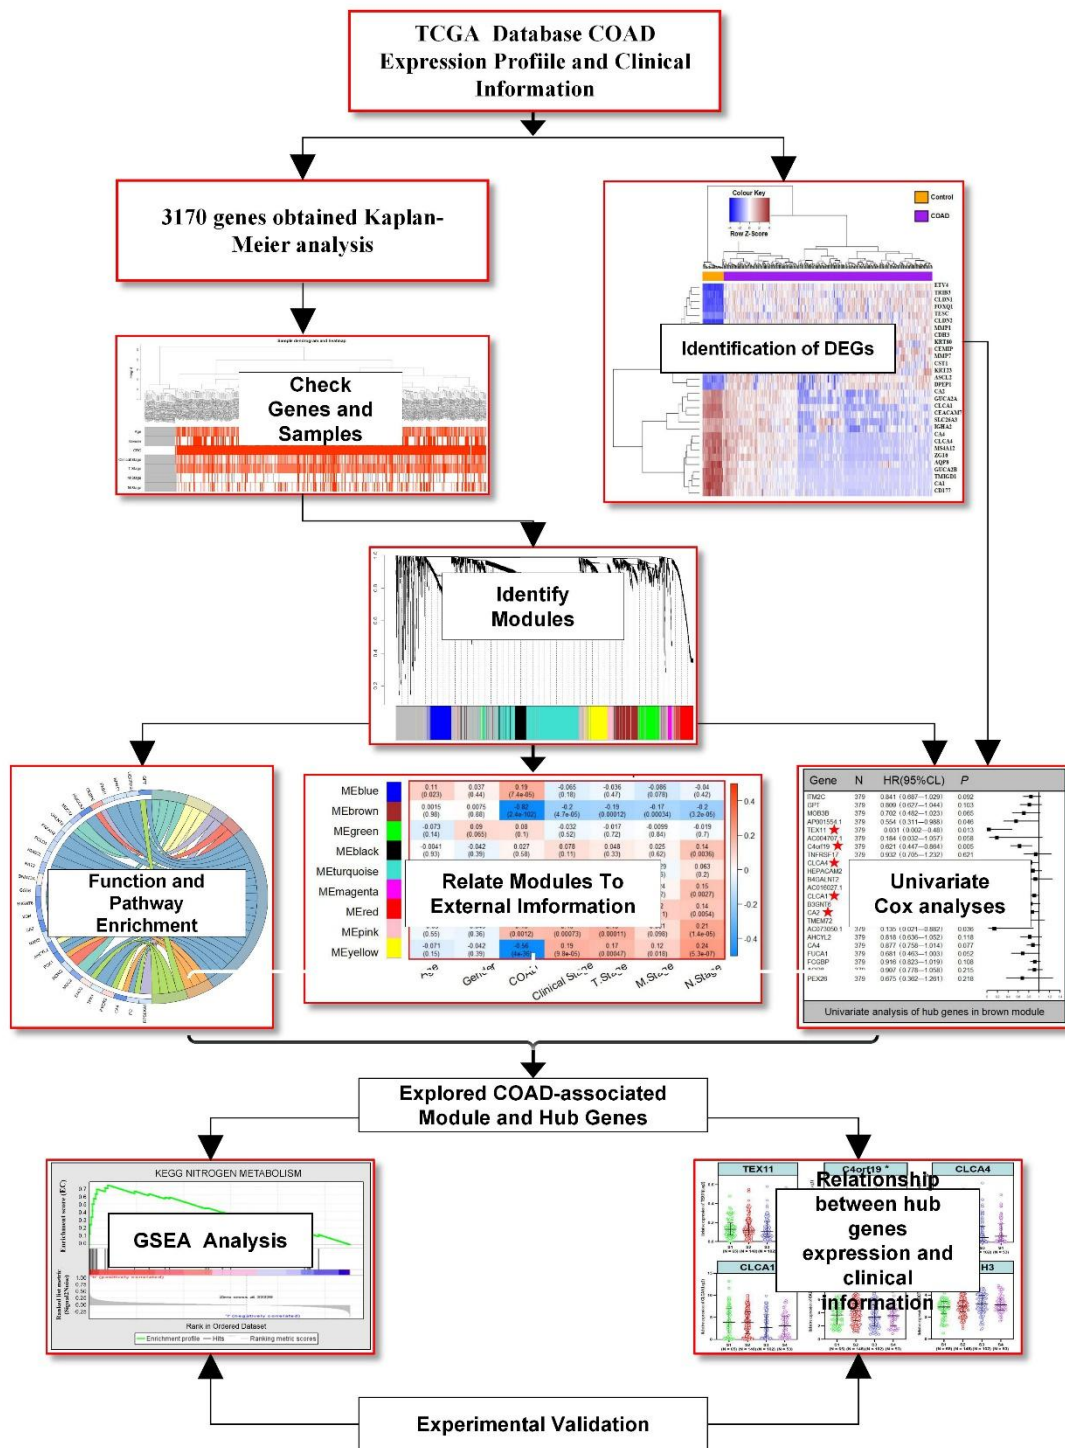

**Supplementary Figure. S2.** Expression of six hub genes between normal tissues and COAD. \*\*\*  $P < 0.001$ .

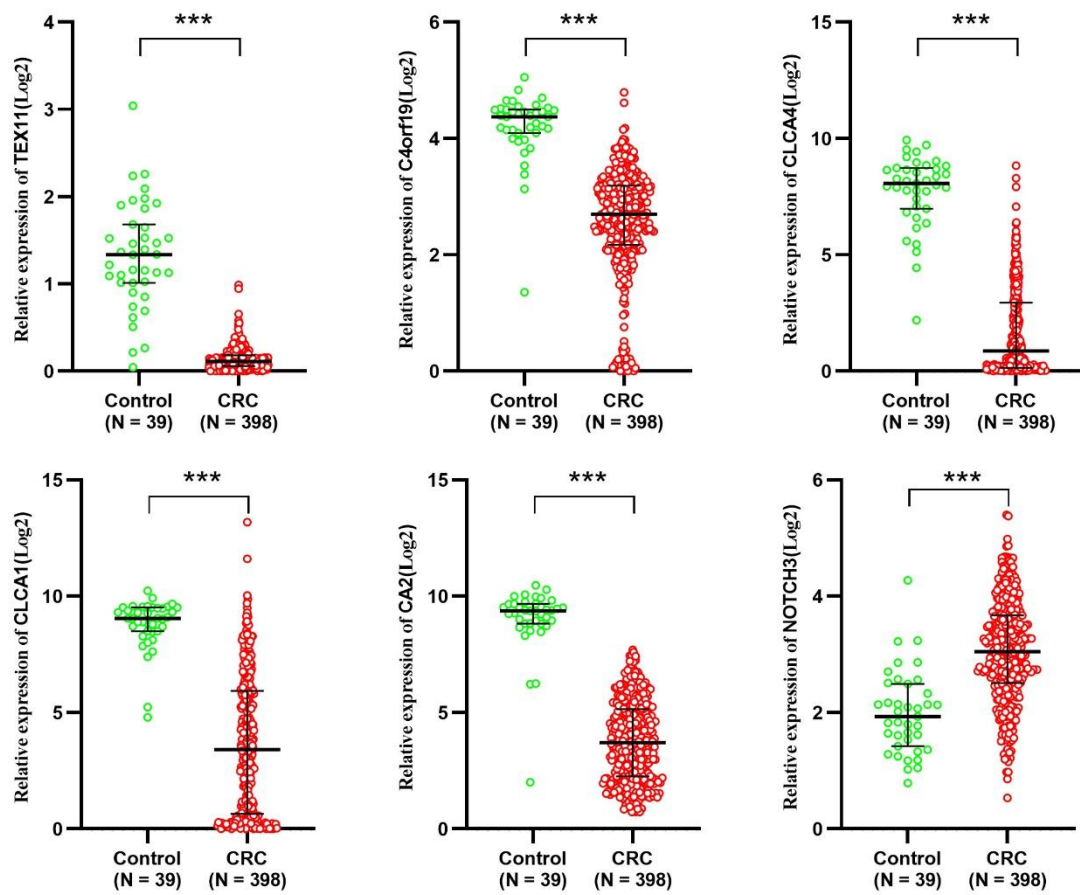

**Supplementary Figure. S3.** The gene sets significantly enriched with high levels of C4orf19 (FDR < 0.05), ordered by enrichment score.

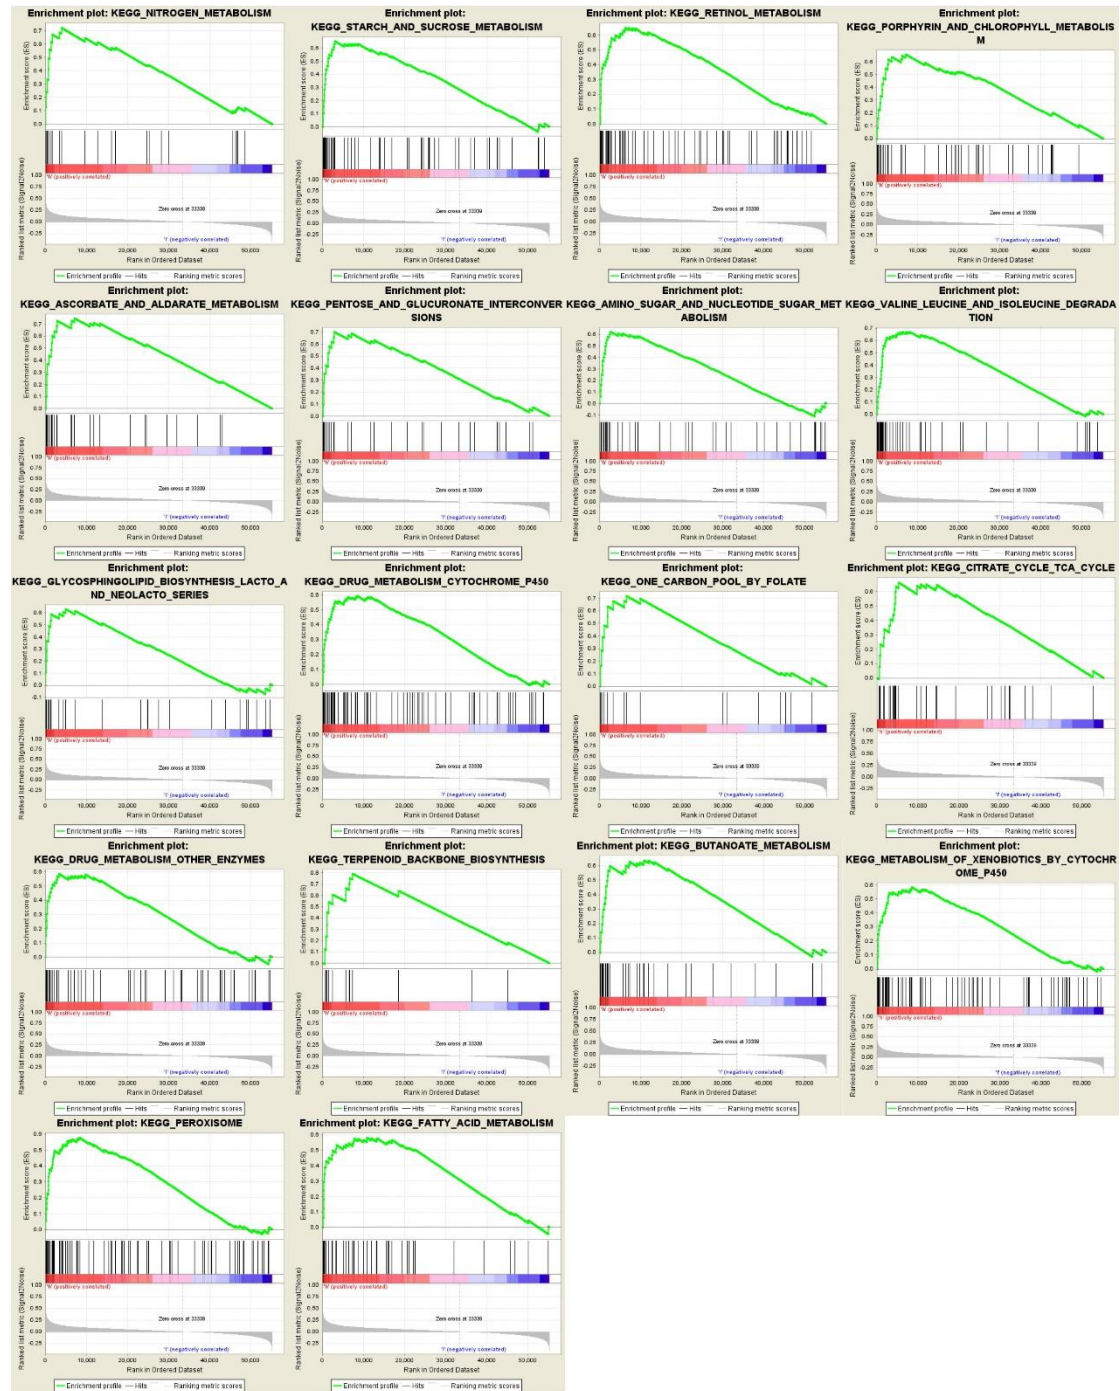

**Supplementary Figure. S4.** The gene set of “nitrogen metabolism pathway” was enriched in high levels of C4orf19 (FDR < 0.05). (A) Transcriptional expression profiles of the significant genes were shown in a heat map. (B) GSEA details of nitrogen metabolism pathway.

A

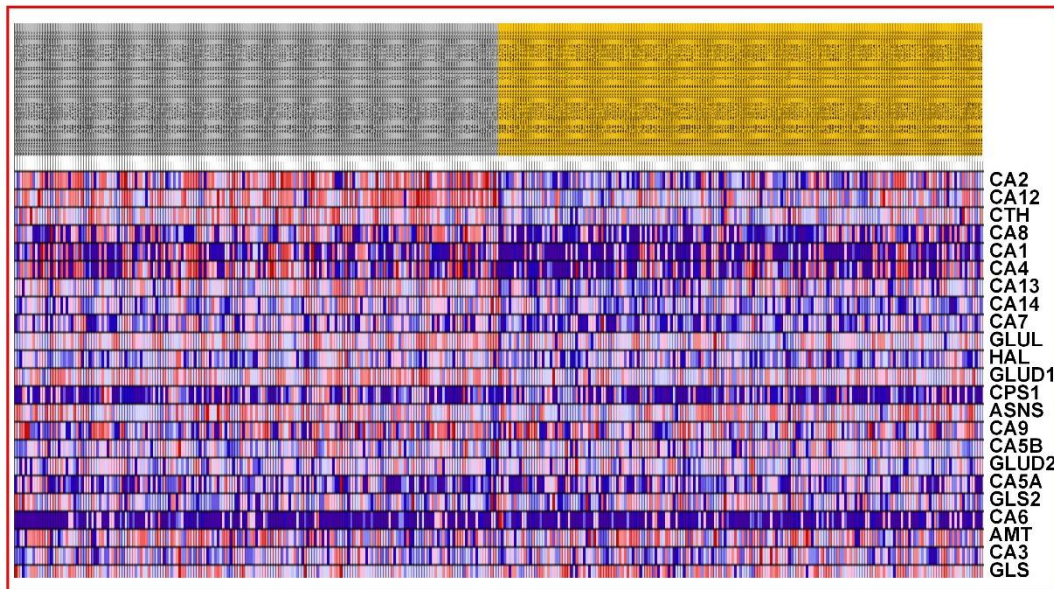

B

|    | PROBE | DESCRIPTION<br>(from dataset) | GENE_SYMBOL | GENE_TITLE | RANK IN GENE LIST | RANK METRIC SCORE | RUNNING ES | CORE ENRICHMENT |
|----|-------|-------------------------------|-------------|------------|-------------------|-------------------|------------|-----------------|
| 1  | CA2   | na                            |             |            | 80                | 0.394             | 0.1258     | Yes             |
| 2  | CA12  | na                            |             |            | 124               | 0.368             | 0.2440     | Yes             |
| 3  | CTH   | na                            |             |            | 368               | 0.295             | 0.3351     | Yes             |
| 4  | CA8   | na                            |             |            | 640               | 0.253             | 0.4120     | Yes             |
| 5  | CA1   | na                            |             |            | 703               | 0.246             | 0.4905     | Yes             |
| 6  | CA4   | na                            |             |            | 940               | 0.224             | 0.5506     | Yes             |
| 7  | CA13  | na                            |             |            | 1360              | 0.200             | 0.6157     | Yes             |
| 8  | CA14  | na                            |             |            | 1662              | 0.189             | 0.6712     | Yes             |
| 9  | CA7   | na                            |             |            | 3365              | 0.144             | 0.6870     | Yes             |
| 10 | GLUL  | na                            |             |            | 3868              | 0.136             | 0.7218     | Yes             |
| 11 | HAL   | na                            |             |            | 9562              | 0.087             | 0.6470     | No              |
| 12 | GLUD1 | na                            |             |            | 12645             | 0.073             | 0.6147     | No              |
| 13 | CPS1  | na                            |             |            | 16033             | 0.060             | 0.5727     | No              |
| 14 | ASNS  | na                            |             |            | 17043             | 0.056             | 0.5725     | No              |
| 15 | CA9   | na                            |             |            | 24751             | 0.028             | 0.4422     | No              |
| 16 | CA5B  | na                            |             |            | 25214             | 0.027             | 0.4425     | No              |
| 17 | GLUD2 | na                            |             |            | 28217             | 0.016             | 0.3934     | No              |
| 18 | CA5A  | na                            |             |            | 30022             | 0.010             | 0.3641     | No              |
| 19 | GLS2  | na                            |             |            | 45661             | -0.049            | 0.0967     | No              |
| 20 | CA6   | na                            |             |            | 46304             | -0.053            | 0.1022     | No              |
| 21 | AMT   | na                            |             |            | 46631             | -0.056            | 0.1143     | No              |
| 22 | CA3   | na                            |             |            | 46937             | -0.058            | 0.1275     | No              |
| 23 | GLS   | na                            |             |            | 48590             | -0.072            | 0.1208     | No              |
